# Supplementary material for: Influence of single-cell RNA sequencing data integration on the performance of differential gene expression analysis
Source: PubMed Central journal article supplement (PMC9663917; doi:10.3389/fgene.2022.1009316), 2022-11-01
Supplement: Image1.pdf [file Image1.pdf]

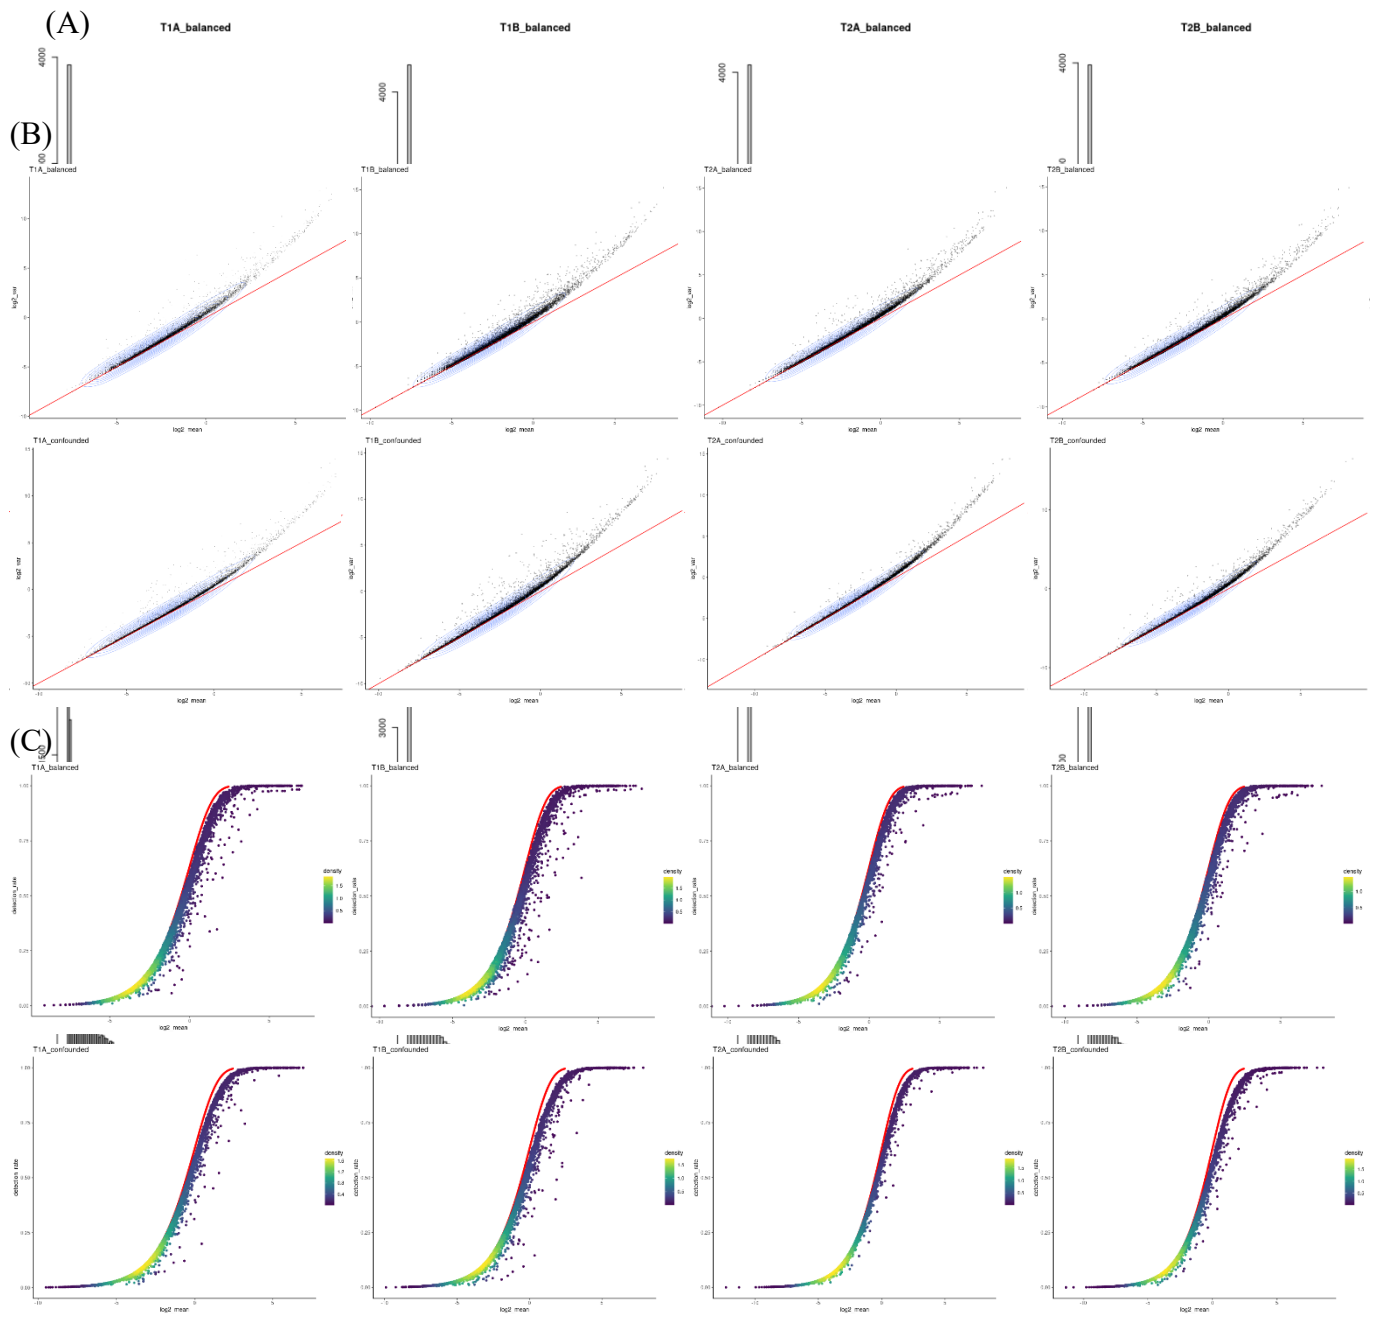

**Supplementary Figure 1.** Feature-level metrics for balanced and confounded (before correction) study. (A) histograms of mean expression, (B) mean-variance relationship, (C) mean-detection rate relationship
